# Supplementary material for: Dental Plaque Microbial Resistomes of Periodontal Health and Disease and Their Changes after Scaling and Root Planing Therapy
Source: PubMed Central journal article supplement (PMC8386447; doi:10.1128/msphere.00162-21), 2021-07-21
Supplement: msphere.00162-21-sf001.pdf [file msphere.00162-21-sf001.pdf]

a

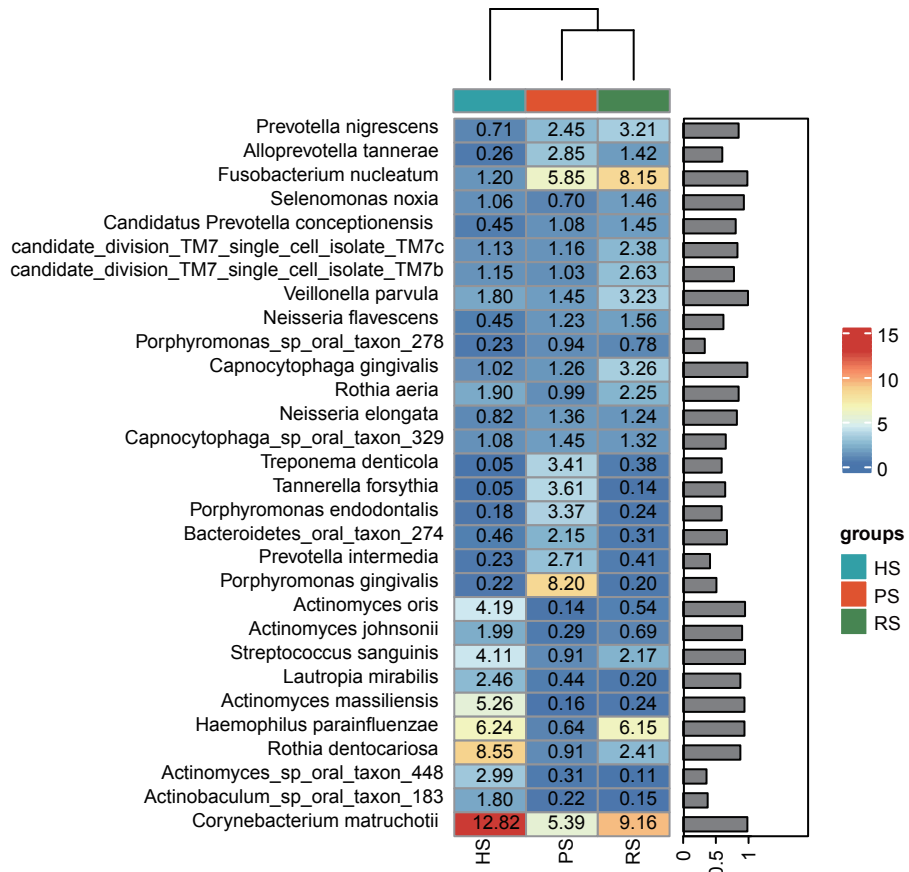

b

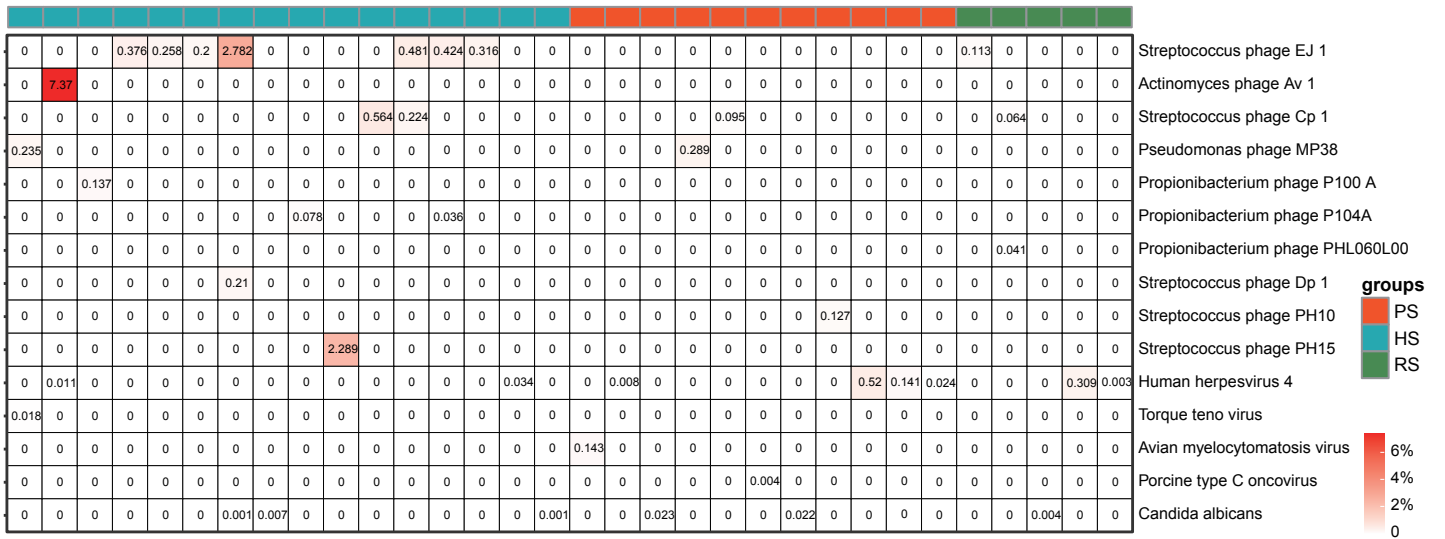

c

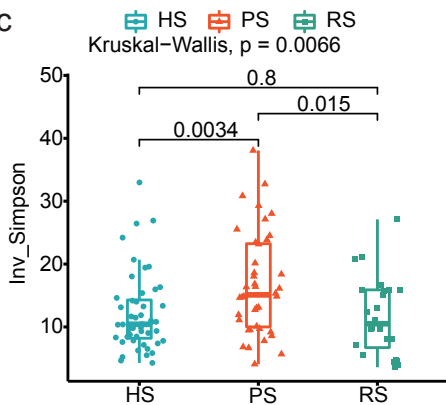

d

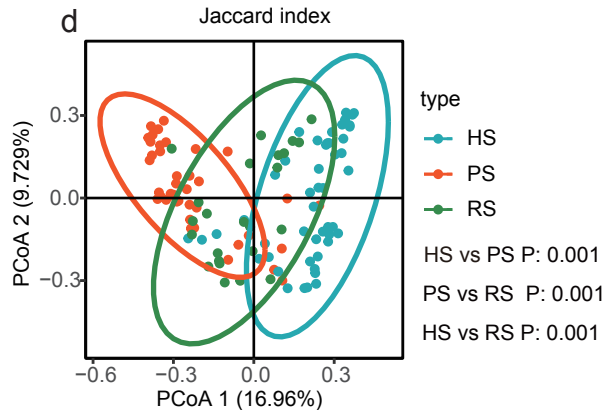

Figure.S1
